# Supplementary material for: Tunable electromagnetic properties of Ti3C2Tx/rGO foams decorated with NiO particles
Source: Royal Society of Chemistry journal article supplement (doi:10.1039/d2ce00823h), 2022-01-01
Supplement: d2ce00823h1.pdf [file d2ce00823h1.pdf]

**Tunable electromagnetic properties of  $\text{Ti}_3\text{C}_2\text{T}_x/\text{rGO}$  foams decorated with NiO particles**

Fan Zhang<sup>a,b</sup>, Siyang Shang<sup>a</sup>, Yaya Li<sup>a,\*</sup>, Bingbing Fan<sup>a</sup>, Rui Zhang<sup>a,c</sup>, Biao Zhao<sup>d,\*</sup>,  
Hongxia Lu<sup>a</sup>, Chengliang Ma<sup>a</sup>

*<sup>a</sup>School of Material Science and Engineering, Zhengzhou University, Zhengzhou 450001, China*

*<sup>b</sup>Henan Vocational College of Information and Statistics, Zhengzhou 450008, China*

*<sup>c</sup>School of Material Science and Engineering, Luoyang Institute of Science and Technology, Luoyang 471023, China.*

*<sup>d</sup>School of Microelectronics, Fudan University, Shanghai 200433, China*

\*Corresponding author: zhaobiao1813@163.com; lyzzu06@126.com

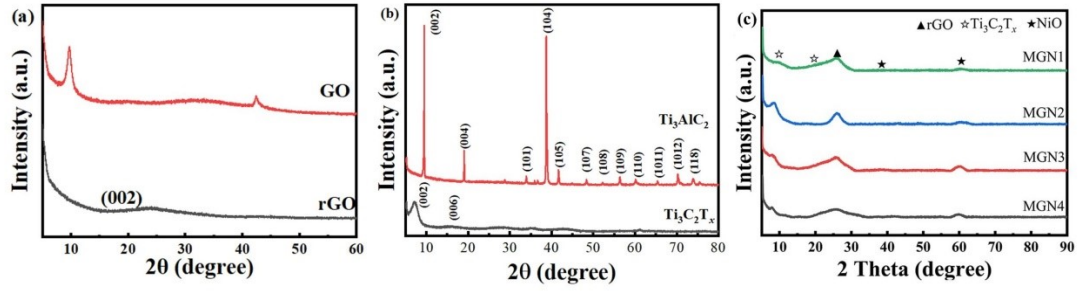

**Figure S1.** XRD patterns of GO, rGO,  $\text{Ti}_3\text{AlC}_2$ ,  $\text{Ti}_3\text{C}_2\text{T}_x$ , and  $\text{Ti}_3\text{C}_2\text{T}_x/\text{rGO}/\text{NiO}$  composites prepared with varying Ni ions concentrations. In the presence of rGO, MGN1, MGN2, MGN3, and MGN4 are labeled for the sample at the weight ratio of  $\text{Ti}_3\text{C}_2\text{T}_x$  to NiO of 2:1, 1:1, 1:2, and 1:3, respectively.

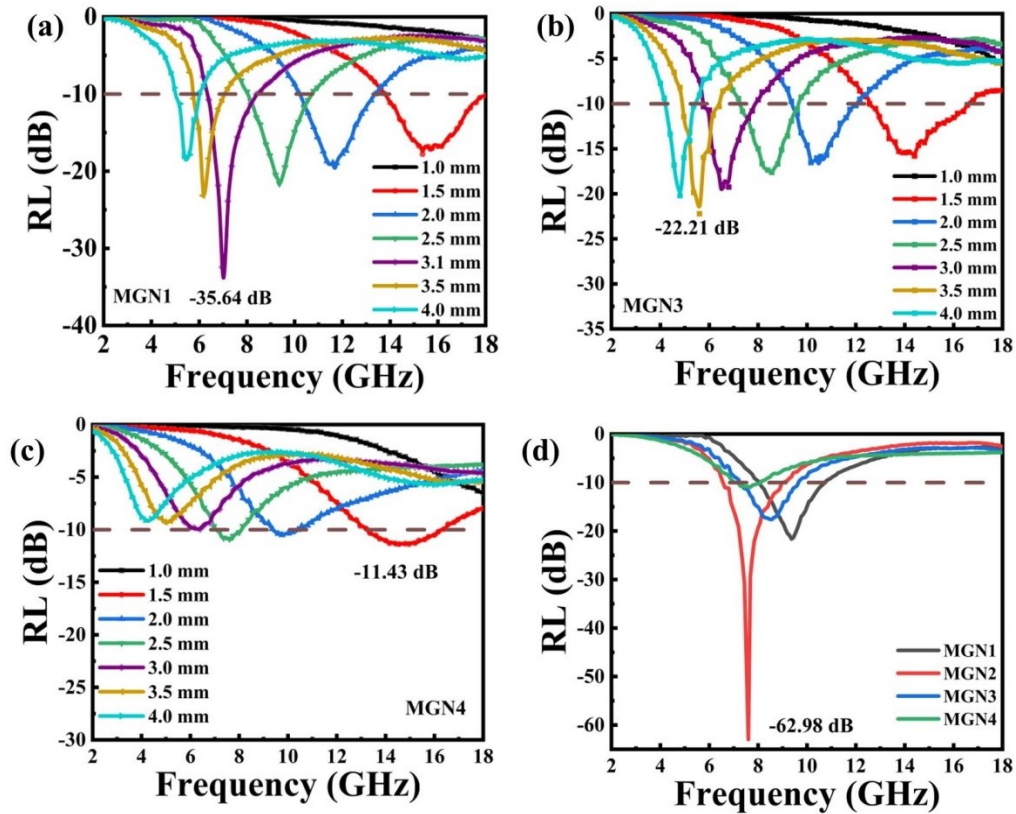

**Figure S2.** Reflection loss (RL) values of  $\text{Ti}_3\text{C}_2\text{T}_x/\text{rGO}/\text{NiO}$  composites at different thicknesses: (a) MGN1, (b) MGN3, (c) MGN4, (d) comparative curves of MGN1-4.
